# Supplementary material for: Drug metabolism and pharmacokinetics of praziquantel: A review of variable drug exposure during schistosomiasis treatment in human hosts and experimental models
Source: PubMed Central journal article supplement (PMC7518612; doi:10.1371/journal.pntd.0008649), 2020-09-25
Supplement: pntd.0008649.s002.pdf [file pntd.0008649.s002.pdf]

**S1 Table. Included studies obtained using the inclusion and exclusion criteria of this review, separated into topics of focus.** The inclusion ID was designated, A: Pharmacokinetics/Pharmacodynamics, B: Drug-drug interactions, C: Metabolite analysis, D: Pharmacogenetics

| Inclusion ID | Title                                                                                                                                                                                                                                                           |
|--------------|-----------------------------------------------------------------------------------------------------------------------------------------------------------------------------------------------------------------------------------------------------------------|
| A/B          | Abla, N., et al. (2017). "Evaluation of the pharmacokinetic-pharmacodynamic relationship of praziquantel in the schistosoma mansoni mouse model: Possible clinical implications." <i>Tropical Medicine and International Health</i> 22 (Supplement 1): 136-137. |
| B            | Araujo, N., et al. (2008). "Association of oxamniquine praziquantel and clonazepam in experimental Schistosomiasis mansoni." <i>Memorias Do Instituto Oswaldo Cruz</i> 103(8): 781-785.                                                                         |
| A            | Bonate, P. L., et al. (2018). "Extrapolation of praziquantel pharmacokinetics to a pediatric population: a cautionary tale." <i>Journal of Pharmacokinetics and Pharmacodynamics</i> 45(5): 747-762.                                                            |
| A            | Botros, S., et al. (2011). "Comparative efficacy and bioavailability of different praziquantel brands." <i>Experimental Parasitology</i> 127(2): 515-521.                                                                                                       |
| B            | Botros, S., et al. (2006). "Effect of adamantylamide dipeptide as adjuvant therapy to praziquantel in mice infected with different S. mansoni isolates." <i>Apmis</i> 114(7-8): 480-491.                                                                        |
| A            | Botros, S. S., et al. (2006). "Drug-metabolizing enzymes and praziquantel bioavailability in mice harboring Schistosoma mansoni isolates of different drug susceptibilities." <i>Journal of Parasitology</i> 92(6): 1344-1349.                                  |
| B            | Botros, S. S., et al. (2010). "Praziquantel efficacy in mice infected with PZQ non-susceptible S. mansoni isolate treated with artemether: Parasitological, biochemical and immunohistochemical assessment." <i>Apmis</i> 118(9): 692-702.                      |
| A            | Bustinduy, A. L., et al. (2016). "Population Pharmacokinetics and Pharmacodynamics of Praziquantel in Ugandan Children with Intestinal Schistosomiasis: Higher Dosages Are Required for Maximal Efficacy." <i>Mbio</i> 7(4).                                    |
| B            | Campelo, Y. D. M., et al. (2017). "Synergistic effects of in vitro combinations of pipartine, epiisopiloturine and praziquantel against Schistosoma mansoni." <i>Biomedicine &amp; Pharmacotherapy</i> 88: 488-499.                                             |
| B            | Ebeid, F. A. (1995). "Efficacy of a combination of metrifonate and praziquantel in the treatment of schistosoma-mansoni infection in albino mice." <i>Arzneimittel-Forschung/Drug Research</i> 45-1(4): 519-521.                                                |
| A            | Elguiniady, M. A., et al. (1994). "Clinical and pharmacokinetic study of praziquantel in Egyptian schistosomiasis patients with and without liver cell failure." <i>American Journal of Tropical Medicine and Hygiene</i> 51(6): 809-818.                       |
| B            | El-Lakkany, N. and M. Nosseir (2007). "Pharmacodynamics of pentoxifylline and/or praziquantel in murine schistosomiasis mansoni." <i>Apmis</i> 115(3): 184-194.                                                                                                 |
| B            | El-Lakkany, N. M., et al. (2011). "Pharmacodynamics of mefloquine and praziquantel combination therapy in mice harbouring juvenile and adult Schistosoma mansoni." <i>Memorias Do Instituto Oswaldo Cruz</i> 106(7): 814-822.                                   |
| A            | Gotardo, M. A., et al. (2011). "Modulation of expression and activity of cytochrome P450s and alteration of praziquantel kinetics during murine schistosomiasis." <i>Memorias Do Instituto Oswaldo Cruz</i> 106(2): 212-219.                                    |
| B            | Hussein, A., et al. (2017). "Evaluation of the Anti-schistosomal Effects of Turmeric (Curcuma longa) Versus Praziquantel in Schistosoma mansoni Infected Mice." <i>Iranian Journal of Parasitology</i> 12(4): 587-596.                                          |
| A/B          | Jung, H., et al. (1997). "Pharmacokinetic study of praziquantel administered alone and in combination with cimetidine in a single-day therapeutic regimen." <i>Antimicrobial Agents and Chemotherapy</i> 41(6): 1256-1259.                                      |
| B            | Keiser, J., et al. (2011). "Interactions of mefloquine with praziquantel in the schistosoma mansoni mouse model and in vitro." <i>Journal of Antimicrobial Chemotherapy</i> 66(8): 1791-1797.                                                                   |

|     |                                                                                                                                                                                                                                                                                                           |
|-----|-----------------------------------------------------------------------------------------------------------------------------------------------------------------------------------------------------------------------------------------------------------------------------------------------------------|
| B   | Keiser, J., et al. (2010). "Activity of antiandrogens against juvenile and adult <i>Schistosoma mansoni</i> in mice." <i>Journal of Antimicrobial Chemotherapy</i> 65(9): 1991-1995.                                                                                                                      |
| A   | Kokwaro, G. O. and G. Taylor (1990). "Effect of experimentally-induced hepatic cirrhosis on the pharmacokinetics of orally administered praziquantel in the rat." <i>Eur J Drug Metab Pharmacokinet</i> 15(3): 199-202.                                                                                   |
| A   | Kovac, J., et al. (2018). "Pharmacokinetics of Praziquantel in <i>Schistosoma mansoni</i> - and <i>Schistosoma haematobium</i> -Infected School- and Preschool-Aged Children." <i>Antimicrobial Agents and Chemotherapy</i> 62(8).                                                                        |
| A   | Kovac, J., et al. (2018). "Evaluation of a novel micro-sampling device, Mitra (TM), in comparison to dried blood spots, for analysis of praziquantel in <i>Schistosoma haematobium</i> -infected children in rural Cote d'Ivoire." <i>Journal of Pharmaceutical and Biomedical Analysis</i> 151: 339-346. |
| A   | Leopold, G., et al. (1978). "Clinical pharmacology in normal volunteers of praziquantel, a new drug against schistosomes and cestodes. An example of a complex study covering both tolerance and pharmacokinetics." <i>European Journal of Clinical Pharmacology</i> 14(4): 281-291.                      |
| A/B | Lima, R. M., et al. (2011). "Albendazole-praziquantel interaction in healthy volunteers: kinetic disposition, metabolism and enantioselectivity." <i>British Journal of Clinical Pharmacology</i> 71(4): 528-535.                                                                                         |
| A/C | Lima, R. M., et al. (2009). "Enantioselective analysis of praziquantel and trans-4-hydroxypraziquantel in human plasma by chiral LC-MS/MS: Application to pharmacokinetics." <i>Journal of Chromatography B-Analytical Technologies in the Biomedical and Life Sciences</i> 877(27): 3083-3088.           |
| A   | Mandour, M. E., et al. (1990). "Pharmacokinetics of praziquantel in healthy volunteers and patients with schistosomiasis." <i>Transactions of the Royal Society of Tropical Medicine and Hygiene</i> 84(3): 389-393.                                                                                      |
| A/B | Masimirembwa, C. M., et al. (1993). "Effects of phenobarbital and 3-methylcholanthrene pretreatment on the pharmacokinetics of praziquantel in rats." <i>European Journal of Drug Metabolism and Pharmacokinetics</i> 18(3): 261-264.                                                                     |
| A/B | Masimirembwa, C. M., et al. (1994). "The effect of chloroquine on the pharmacokinetics and metabolism of praziquantel in rats and in humans." <i>Biopharmaceutics &amp; Drug Disposition</i> 15(1): 33-43.                                                                                                |
| A   | Meister, I., et al. (2014). "Activity of praziquantel enantiomers and main metabolites against <i>Schistosoma mansoni</i> ." <i>Antimicrobial Agents and Chemotherapy</i> 58(9): 5466-5472.                                                                                                               |
| A   | Metwally, A., et al. (1995). "Impact of drug dosage and brand on bioavailability and efficacy of praziquantel." <i>Pharmacological Research</i> 31(1): 53-59.                                                                                                                                             |
| A/B | Metwally, A., et al. (1995). "Effect of cimetidine, bicarbonate and glucose on the bioavailability of different formulations of praziquantel." <i>Arzneimittel-Forschung/Drug Research</i> 45-1(4): 516-518.                                                                                              |
| A   | Ofori-Adjei, D., et al. (1988). "Oral praziquantel kinetics in normal and <i>Schistosoma haematobium</i> -infected subjects." <i>Ther Drug Monit</i> 10(1): 45-49.                                                                                                                                        |
| A   | Pehrson, P. O., et al. (1983). "Treatment with praziquantel in a patient with schistosomiasis and chronic renal failure." <i>Trans R Soc Trop Med Hyg</i> 77(5): 687-688.                                                                                                                                 |
| C   | Schepmann, D. and G. Blaschke (2001). "Isolation and identification of 8-hydroxypraziquantel as a metabolite of the antischistosomal drug praziquantel." <i>J Pharm Biomed Anal</i> 26(5-6): 791-799.                                                                                                     |
| A   | Tanaka, M., et al. (1989). "A comparison of the antischistosomal effect of levo- and dextro-praziquantel on <i>Schistosoma japonicum</i> and <i>S. mansoni</i> in mice." <i>American Journal of Tropical Medicine and Hygiene</i> 41(2): 198-203.                                                         |
| B   | Utzinger, J., et al. (2001). "Effect of combined treatment with praziquantel and artemether on <i>Schistosoma japonicum</i> and <i>Schistosoma mansoni</i> in experimentally infected animals." <i>Acta Tropica</i> 80(1): 9-18.                                                                          |
| C   | Wang, H. N., et al. (2014). "Metabolic profiling of praziquantel enantiomers." <i>Biochemical Pharmacology</i> 90(2): 166-178.                                                                                                                                                                            |
| A   | Zhang, D. L., et al. (2017). "A quantification method for determination of racemate praziquantel and R-enantiomer in rat plasma for comparison of their pharmacokinetics." <i>Journal of Chromatography B-Analytical Technologies in the Biomedical and Life Sciences</i> 1048: 64-69.                    |
