# Supplementary material for: Drug metabolism and pharmacokinetics of praziquantel: A review of variable drug exposure during schistosomiasis treatment in human hosts and experimental models
Source: PubMed Central journal article supplement (PMC7518612; doi:10.1371/journal.pntd.0008649), 2020-09-25
Supplement: pntd.0008649.s003.pdf [file pntd.0008649.s003.pdf]

**S2 Table. Comparison of different brands of praziquantel (PZQ) on the pharmacokinetic (PK) parameters in a rodent model.** The brands, when named, were listed in subscript; P: Pure PZQ, T3A: T3A Pharmaceuticals Company PZQ, BILT: Biltricide, DIS: Distocide, BILH: Bilharzid, EPI: Epiquantel. The superscript descriptions show the additional information of the study. R: Rat, HR: Healthy Rat, M: Mouse, HM: Healthy Mouse, PB-PZQ: Polymorph B, (a): PID30 (male), (b): PID30 (female), (c): PID55 (male), (d): PID55 (female), (e): Pre-dosed with THIO and in a fasted state, (f): PZQ-susceptible *S. mansoni* isolate CD, (g): PZQ-non-susceptible *S. mansoni* isolate EE2 and BANL. Unless otherwise stated the following acronyms represent; AUC: Area under the plasma concentration-time curve, B (AUC<sub>0-inf</sub>): Area under the plasma concentration-time curve extrapolated from time zero to infinity, t<sub>1/2</sub>: Elimination half-life, C<sub>max</sub>: Peak plasma concentration, T<sub>max</sub>: Time to reach peak plasma concentration following drug administration.

| Drug Administered          | Drug Measured | PZQ Dose (mg/kg) | N | t <sub>1/2</sub> (1/h) | T <sub>max</sub> (h) | C <sub>max</sub> (ng/ml) | AUC (ng/ml/h)               |
|----------------------------|---------------|------------------|---|------------------------|----------------------|--------------------------|-----------------------------|
| PZQ <sup>[1]</sup>         |               | 10               |   |                        |                      |                          |                             |
| HR                         | PZQ           |                  | 6 | 1.54                   | 0.58                 | 377                      | 441                         |
| HR                         | (R)- PZQ      |                  | 6 | 1.08                   | 0.5                  | 168                      | 177                         |
| PZQ <sup>[2]</sup>         |               | 25               |   |                        |                      |                          |                             |
| R <sup>(e)</sup>           | PZQ           |                  | 5 | 0.55                   | 0.65                 | 900                      | -                           |
| PZQ <sup>[3]</sup>         |               | 50               |   |                        |                      |                          |                             |
| M <sup>(mansoni)</sup>     | (R)- PZQ      |                  | 4 | 5.9                    | 0.5                  | 700                      | 2200 <sup>B</sup> (ng*h/mL) |
| M <sup>(mansoni)</sup>     | (S)- PZQ      |                  | 4 | 5.5                    | 0.5                  | 200                      | 3600 <sup>B</sup> (ng*h/mL) |
| PB-PZQ                     |               |                  |   |                        |                      |                          |                             |
| M <sup>(mansoni)</sup>     | (R)- PZQ      |                  | 4 | 5.4                    | 0.5                  | 200                      | 400 <sup>B</sup> (ng*h/mL)  |
| M <sup>(mansoni)</sup>     | (S)- PZQ      |                  | 4 | 5.4                    | 0.5                  | 100                      | 300 <sup>B</sup> (ng*h/mL)  |
| PZQ <sup>[3]</sup>         |               | 100              |   |                        |                      |                          |                             |
| M <sup>(mansoni)</sup>     | (R)- PZQ      |                  | 4 | 2.6                    | 0.5                  | 700                      | 1300 <sup>B</sup> (ng*h/mL) |
| M <sup>(mansoni)</sup>     | (S)- PZQ      |                  | 4 | 0.4                    | 0.5                  | 100                      | 300 <sup>B</sup> (ng*h/mL)  |
| PB-PZQ <sup>[3]</sup>      |               |                  |   |                        |                      |                          |                             |
| M <sup>(mansoni)</sup>     | (R)- PZQ      |                  | 4 | 10.6                   | 0.5                  | 300                      | 1900 <sup>B</sup> (ng*h/mL) |
| M <sup>(mansoni)</sup>     | (S)- PZQ      |                  | 4 | 20.4                   | 0.5                  | 100                      | 1600 <sup>B</sup> (ng*h/mL) |
| PZQ <sup>[3,4]</sup>       | PZQ           | 200              |   |                        |                      |                          |                             |
| M <sup>(a)</sup> (mansoni) |               |                  | 7 |                        | 0.46                 | 31598                    | 19650                       |
| M <sup>(b)</sup> (mansoni) |               |                  | 7 |                        | 0.64                 | 34168                    | 40583                       |
| M <sup>(c)</sup> (mansoni) |               |                  | 7 |                        | 0.4                  | 26433                    | 81017                       |
| M <sup>(d)</sup> (mansoni) |               |                  | 7 |                        | 0.63                 | 27473                    | 76833                       |
| M <sup>(mansoni)</sup>     | (R)- PZQ      |                  | 4 | 3.3                    | 0.8                  | 2100                     | 7100 <sup>B</sup> (ng*h/mL) |

|                       |                                            |          |     |      |       |       |                                                            |
|-----------------------|--------------------------------------------|----------|-----|------|-------|-------|------------------------------------------------------------|
| PB-PZQ <sup>[3]</sup> | <i>M</i> <sup>(a)</sup> ( <i>mansoni</i> ) | (S)- PZQ | 4   | 6    | 0.8   | 2900  | 11500 <sup>B</sup><br>(ng*h/mL)                            |
|                       | <i>M</i> <sup>(b)</sup> ( <i>mansoni</i> ) | (R)- PZQ | 4   | 3.1  | 0.5   | 900   |                                                            |
|                       | <i>M</i> <sup>(c)</sup> ( <i>mansoni</i> ) | (S)- PZQ | 4   | 1.5  | 0.5   | 400   | 3000 <sup>B</sup> (ng*h/mL)<br>1000 <sup>B</sup> (ng*h/mL) |
| PZQ <sup>[3]</sup>    |                                            |          | 300 |      |       |       |                                                            |
| PB-PZQ <sup>[3]</sup> | <i>M</i> <sup>(a)</sup> ( <i>mansoni</i> ) | (R)- PZQ | 4   | 5.9  | 0.5   | 800   | 2500 <sup>B</sup> (ng*h/mL)                                |
|                       | <i>M</i> <sup>(b)</sup> ( <i>mansoni</i> ) | (S)- PZQ | 4   | 6.4  | 0.5   | 300   | 1000 <sup>B</sup> (ng*h/mL)                                |
| PB-PZQ <sup>[3]</sup> | <i>M</i> <sup>(a)</sup> ( <i>mansoni</i> ) | (R)- PZQ | 4   | 4    | 0.8   | 900   | 3100 <sup>B</sup> (ng*h/mL)                                |
|                       | <i>M</i> <sup>(b)</sup> ( <i>mansoni</i> ) | (S)- PZQ | 4   | 5.4  | 0.8   | 200   | 900 <sup>B</sup> (ng*h/mL)                                 |
| PZQ <sup>[3,4]</sup>  |                                            | PZQ      | 400 |      |       |       |                                                            |
| PB-PZQ <sup>[3]</sup> | <i>M</i> <sup>(a)</sup> ( <i>mansoni</i> ) |          | 7   |      | 0.4   | 35996 | 57700                                                      |
|                       | <i>M</i> <sup>(b)</sup> ( <i>mansoni</i> ) |          | 7   |      | 0.64  | 58458 | 114383                                                     |
|                       | <i>M</i> <sup>(c)</sup> ( <i>mansoni</i> ) |          | 7   |      | 0.4   | 31846 | 132800                                                     |
|                       | <i>M</i> <sup>(d)</sup> ( <i>mansoni</i> ) |          | 7   |      | 0.63  | 51399 | 146017                                                     |
|                       | <i>M</i> <sup>(a)</sup> ( <i>mansoni</i> ) | (R)- PZQ | 4   | 3.3  | 0.8   | 2700  | 6400 <sup>B</sup> (ng*h/mL)                                |
|                       | <i>M</i> <sup>(b)</sup> ( <i>mansoni</i> ) | (S)- PZQ | 4   | 4.7  | 0.8   | 500   | 1900 <sup>B</sup> (ng*h/mL)                                |
| PB-PZQ <sup>[3]</sup> | <i>M</i> <sup>(a)</sup> ( <i>mansoni</i> ) | (R)- PZQ | 4   | 5.3  | 0.5   | 1600  | 3100 <sup>B</sup> (ng*h/mL)                                |
|                       | <i>M</i> <sup>(b)</sup> ( <i>mansoni</i> ) | (S)- PZQ | 4   | 7.1  | 0.5   | 700   | 1500 <sup>B</sup> (ng*h/mL)                                |
| PZQ <sup>[5]</sup>    |                                            | PZQ      | 500 |      |       |       |                                                            |
| PZQ <sup>[6]</sup>    | <i>M</i> <sup>(f)</sup> ( <i>mansoni</i> ) |          | 77  | 1.11 | 0.087 | 33330 | 42920                                                      |
|                       | <i>M</i> <sup>(g)</sup> ( <i>mansoni</i> ) |          | 77  | 0.89 | 0.084 | 23440 | 26990                                                      |
|                       | <i>M</i> <sup>(g)</sup> ( <i>mansoni</i> ) |          | 77  | 0.93 | 0.076 | 18600 | 11280                                                      |
| PZQ <sup>[6]</sup>    | <i>HM</i> <sub>(P)</sub>                   |          | 11  | 1.05 | 0.11  | 14840 | 12260                                                      |
|                       | <i>HM</i> <sub>(T3A)</sub>                 |          | 11  | 0.46 | 0.12  | 10630 | 8350                                                       |
|                       | <i>HM</i> <sub>(DIS)</sub>                 |          | 11  | 0.78 | 0.08  | 12790 | 10190                                                      |
|                       | <i>HM</i> <sub>(BILT)</sub>                |          | 11  | 1.18 | 0.11  | 13210 | 11100                                                      |
|                       | <i>HM</i> <sub>(BILH)</sub>                |          | 11  | 0.42 | 0.08  | 11000 | 6620                                                       |
|                       | <i>HM</i> <sub>(EP)</sub>                  |          | 11  | 0.52 | 0.09  | 10790 | 8290                                                       |

## References

1. Zhang DL, Wang HN, Ji JB, Nie L, Sun DQ. A quantification method for determination of racemate praziquantel and R-enantiomer in rat plasma for comparison of their pharmacokinetics. *Journal of Chromatography B-Analytical Technologies in the Biomedical and Life Sciences*. 2017;1048:64-9. doi: 10.1016/j.jchromb.2017.02.013. PubMed PMID: WOS:000397686500008.
2. Kokwaro GO, Taylor G. Effect of experimentally-induced hepatic cirrhosis on the pharmacokinetics of orally administered praziquantel in the rat. *European journal of drug metabolism and pharmacokinetics*. 1990;15(3):199-202. Epub 1990/07/01. doi: 10.1007/bf03190204. PubMed PMID: 2253649.
3. Lombardo FC, Perissutti B, Keiser J. Activity and pharmacokinetics of a praziquantel crystalline polymorph in the *Schistosoma mansoni* mouse model. *European Journal of Pharmaceutics and Biopharmaceutics*. 2019;142:240-6. doi: <https://doi.org/10.1016/j.ejpb.2019.06.029>.
4. Gotardo MA, Hyssa JT, Carvalho RS, De-Carvalho RR, Gueiros LS, Siqueira CM, et al. Modulation of expression and activity of cytochrome P450s and alteration of praziquantel

kinetics during murine schistosomiasis. *Memorias Do Instituto Oswaldo Cruz*. 2011;106(2):212-9. doi: 10.1590/s0074-02762011000200016. PubMed PMID: WOS:000289961100016.

5. Botros SS, El-Din SHS, El-Lakkany NM, Sabra ANA, Ebeid FA. Drug-metabolizing enzymes and praziquantel bioavailability in mice harboring *Schistosoma mansoni* isolates of different drug susceptibilities. *Journal of Parasitology*. 2006;92(6):1344-9. doi: 10.1645/ge-865r.1. PubMed PMID: WOS:000243959800032.

6. Botros S, El-Lakkany N, el-Din SHS, Sabra AN, Ibrahim M. Comparative efficacy and bioavailability of different praziquantel brands. *Experimental parasitology*. 2011;127(2):515-21. doi: 10.1016/j.exppara.2010.10.019. PubMed PMID: WOS:000286643300029.
