# Supplementary material for: Drug metabolism and pharmacokinetics of praziquantel: A review of variable drug exposure during schistosomiasis treatment in human hosts and experimental models
Source: PubMed Central journal article supplement (PMC7518612; doi:10.1371/journal.pntd.0008649), 2020-09-25
Supplement: pntd.0008649.s004.pdf [file pntd.0008649.s004.pdf]

**S3 Table. Comparison of different brands of praziquantel (PZQ) on efficacy of treatment in an infected murine model.** Statistical significance was assessed by Botros *et al.* [1] using a two-tailed Student's t-test between the means of different groups. Results for this study were considered significant if  $P < 0.05$ : \* $P < 0.05$ , \*\* $P < 0.01$ , \*\*\* $P < 0.001$ . The brands, when named, are listed in subscript; P: Pure PZQ, T3A: T3A PZQ, BILT: Biltricide, DIS: Distocide, BILH: Bilharzid, EPI: Epiquantel. The superscript descriptions show the additional information of the study; (a): PZQ-susceptible *S. mansoni* isolate CD, (b): PZQ-non-susceptible *S. mansoni* isolate EE2. Unless otherwise stated the following acronyms represent; M: Mouse, WBR: Worm burden reduction.

| Drug Administered                          | Drug Measured | PZQ Dose (mg/kg) | N | WBR (%) |
|--------------------------------------------|---------------|------------------|---|---------|
| PZQ <sub>(P)</sub> <sup>[1]</sup>          | <i>PZQ</i>    | (5x25)           |   |         |
| <i>M</i> <sup>(a)</sup> ( <i>mansoni</i> ) |               |                  | 9 | 53.81   |
| <i>M</i> <sup>(b)</sup> ( <i>mansoni</i> ) |               |                  | 7 | 47.4    |
| PZQ <sub>(T3A)</sub> <sup>[1]</sup>        |               |                  |   |         |
| <i>M</i> <sup>(a)</sup> ( <i>mansoni</i> ) |               |                  | 8 | 39.9    |
| <i>M</i> <sup>(b)</sup> ( <i>mansoni</i> ) |               |                  | 8 | 31.9**  |
| PZQ <sub>(DIS)</sub> <sup>[1]</sup>        |               |                  |   |         |
| <i>M</i> <sup>(a)</sup> ( <i>mansoni</i> ) |               |                  | 7 | 44.8    |
| <i>M</i> <sup>(b)</sup> ( <i>mansoni</i> ) |               |                  | 8 | 33.3    |
| PZQ <sub>(BILT)</sub> <sup>[1]</sup>       |               |                  |   |         |
| <i>M</i> <sup>(a)</sup> ( <i>mansoni</i> ) |               |                  | 7 | 49.3    |
| <i>M</i> <sup>(b)</sup> ( <i>mansoni</i> ) |               |                  | 9 | 38.9    |
| PZQ <sub>(BILH)</sub> <sup>[1]</sup>       |               |                  |   |         |
| <i>M</i> <sup>(a)</sup> ( <i>mansoni</i> ) |               |                  | 7 | 40.8    |
| <i>M</i> <sup>(b)</sup> ( <i>mansoni</i> ) |               |                  | 8 | 23.2**  |
| PZQ <sub>(EPI)</sub> <sup>[1]</sup>        |               |                  |   |         |
| <i>M</i> <sup>(a)</sup> ( <i>mansoni</i> ) |               |                  | 7 | 41.25   |
| <i>M</i> <sup>(b)</sup> ( <i>mansoni</i> ) |               |                  | 7 | 28.1*   |

## References

1. Botros S, El-Lakkany N, el-Din SHS, Sabra AN, Ibrahim M. Comparative efficacy and bioavailability of different praziquantel brands. *Experimental parasitology*. 2011;127(2):515-21. doi: 10.1016/j.exppara.2010.10.019. PubMed PMID: WOS:000286643300029.
