# Supplementary material for: Drug metabolism and pharmacokinetics of praziquantel: A review of variable drug exposure during schistosomiasis treatment in human hosts and experimental models
Source: PubMed Central journal article supplement (PMC7518612; doi:10.1371/journal.pntd.0008649), 2020-09-25
Supplement: pntd.0008649.s005.pdf [file pntd.0008649.s005.pdf]

**S4 Table. Comparison of the WBR in an infected murine model when dosing racemic praziquantel (PZQ), or a single enantiomer.** The relationship between WBR and drug formulation was found to be significantly different ( $P < 0.05$ ) for each PZQ dose based on the results of the Independent-Samples Kruskal-Wallis Test. Unless otherwise stated the following acronyms represent; M: Mouse and WBR: Worm burden reduction.

| Drug Administered         | Drug Measured   | PZQ Dose (mg/kg) | N | WBR (%) |
|---------------------------|-----------------|------------------|---|---------|
| PZQ <sup>[1, 2]</sup>     | <i>PZQ</i>      |                  |   |         |
| <i>M (mansoni)</i>        |                 | 50               | 5 | 12.6    |
| <i>M (mansoni)</i>        |                 | 100              | 4 | 15      |
| <i>M (mansoni)</i>        |                 | 400              | 6 | 94.1    |
| <i>M (mansoni)</i>        |                 | 500              | 7 | 38.9    |
| (R)-PZQ <sup>[1, 2]</sup> | <i>(R)- PZQ</i> |                  |   |         |
| <i>M (mansoni)</i>        |                 | 50               | 7 | 6.8     |
| <i>M (mansoni)</i>        |                 | 100              | 6 | 52      |
| <i>M (mansoni)</i>        |                 | 200              | 6 | 98.1    |
| <i>M (mansoni)</i>        |                 | 400              | 3 | 100     |
| <i>M (mansoni)</i>        |                 | 500              | 7 | 32.4    |
| (S)-PZQ <sup>[1, 2]</sup> | <i>(S)- PZQ</i> |                  |   |         |
| <i>M (mansoni)</i>        |                 | 50               | 6 | 25.5    |
| <i>M (mansoni)</i>        |                 | 400              | 4 | 18      |
| <i>M (mansoni)</i>        |                 | 500              | 7 | 50.9    |
| <i>M (mansoni)</i>        |                 | 800              | 6 | 19.6    |

## **References**

1. Meister I, Ingram-Sieber K, Cowan N, Todd M, Robertson MN, Meli C, et al. Activity of praziquantel enantiomers and main metabolites against *Schistosoma mansoni*. Antimicrobial agents and chemotherapy. 2014;58(9):5466-72. doi: <http://dx.doi.org/10.1128/AAC.02741-14>. PubMed PMID: 373772543.
2. Tanaka M, Ohmae H, Utsunomiya H, Nara T, Irie Y, Yasuraoka K. A comparison of the antischistosomal effect of levo- and dextro-praziquantel on *Schistosoma japonicum* and *S. mansoni* in mice. American Journal of Tropical Medicine and Hygiene. 1989;41(2):198-203. PubMed PMID: 19224762.
