# Supplementary material for: Drug metabolism and pharmacokinetics of praziquantel: A review of variable drug exposure during schistosomiasis treatment in human hosts and experimental models
Source: PubMed Central journal article supplement (PMC7518612; doi:10.1371/journal.pntd.0008649), 2020-09-25
Supplement: pntd.0008649.s006.pdf [file pntd.0008649.s006.pdf]

**S5 Table. Pharmacokinetic parameters of praziquantel (PZQ) enantiomers and its major metabolites in in Healthy Normal Volunteers (HNV) after administration of racemic PZQ, or the single PZQ enantiomer itself.** Using an Independent-Samples Kruskal-Wallis Test, the difference in AUC of the enantiomers found to be statistically significant (P=0.007) at 40 mg/kg only. The brands, when named, are listed in subscript: (ODT): represents new racemic 150mg oral dispersion formulation (dispersed in water), L-ODT: (R)-PZQ formulation, CYS: Cysticide formulation given with water. The superscript descriptions show the additional information of the study; (a): Fasting, (b): Without H<sub>2</sub>O, (c): Crushed tablets and Fed state. Unless otherwise stated the following acronyms represent; AUC: Area under the plasma concentration-time curve, B (AUC<sub>0-inf</sub>): Area under the plasma concentration-time curve extrapolated from time zero to infinity, t<sub>1/2</sub>: Elimination half-life, C<sub>max</sub>: Peak plasma concentration, T<sub>max</sub>: Time to reach peak plasma concentration following drug administration.

| PZQ Dose<br>(mg/kg) | Drug<br>Administered              | Drug<br>Measured | N  | t <sub>1/2</sub><br>(h) | T <sub>max</sub><br>(h) | C <sub>max</sub><br>(ng/ml) | AUC        |                               |
|---------------------|-----------------------------------|------------------|----|-------------------------|-------------------------|-----------------------------|------------|-------------------------------|
|                     |                                   |                  |    |                         |                         |                             | (ng* h/ml) | (ng* h/ml)                    |
| 10                  | (R)-PZQ (L-ODT) <sup>[1, 2]</sup> |                  |    |                         |                         |                             |            |                               |
|                     | HNV                               | (R)-PZQ          | 18 | 1.06 (N=17)             | 2.25                    | 90                          |            | 217 <sup>B</sup> (N=17)       |
| 20                  | (R)-PZQ (L-ODT) <sup>[1, 2]</sup> |                  |    |                         |                         |                             |            |                               |
|                     | HNV                               | (R)-PZQ          | 36 | 2.98                    | 2.50                    | 379                         |            | 825 <sup>B</sup>              |
|                     | HNV <sup>(a)</sup>                |                  | 35 | 2.80                    | 2.00                    | 131                         |            | 506 <sup>B</sup>              |
|                     | HNV <sup>(b)</sup>                |                  | 36 | 2.71                    | 4.00                    | 471                         |            | 955 <sup>B</sup>              |
|                     | PZQ (ODT) <sup>[1, 2]</sup>       |                  |    |                         |                         |                             |            |                               |
|                     | HNV                               | (R)-PZQ          | 15 | 1.92 (N=14)             | 4.00                    | 155                         |            | 345 <sup>B</sup>              |
| 30                  | HNV                               | (S)-PZQ          | 15 | 3.96                    | 3.50                    | 786                         |            | 2226 <sup>B</sup>             |
|                     | (R)-PZQ (L-ODT) <sup>[1, 2]</sup> |                  |    |                         |                         |                             |            |                               |
| 40                  | HNV                               | (R)-PZQ          | 17 | 3.30                    | 3.00                    | 1052                        |            | 2324.9 <sup>B</sup>           |
|                     | PZQ (ODT) <sup>[1, 2]</sup>       |                  |    |                         |                         |                             |            |                               |
|                     | HNV                               | (R)-PZQ          | 30 | 3.31                    | 3.00                    | 881                         |            | 1928,1970 <sup>B</sup>        |
|                     | HNV <sup>(a)</sup>                |                  | 14 | 4.17                    | 4.25                    | 189                         |            | 864 ,925 <sup>B</sup>         |
|                     | HNV                               | (S)-PZQ          | 30 | 4.58                    | 3.00                    | 2330                        |            | 7542 <sup>B</sup>             |
|                     | HNV <sup>(a)</sup>                |                  | 14 | 5.28                    | 4.50                    | 839                         |            | 4996 <sup>B</sup>             |
|                     | PZQ (CYS) <sup>[1, 2]</sup>       |                  |    |                         |                         |                             |            |                               |
|                     | HNV                               | (R)-PZQ          | 30 | 3.83                    | 1.50                    | 763                         |            | 2048 <sup>B</sup> , 1994      |
|                     | HNV <sup>(c)</sup>                |                  | 15 | 3.07 (N=14)             | 2.50                    | 446                         |            | 1538 <sup>B</sup> (N=14),1343 |
|                     | HNV                               | (S)-PZQ          | 30 | 4.62                    | 2.00                    | 2179                        |            | 8293 <sup>B</sup>             |
| 60                  | HNV                               |                  | 15 | 4.35                    | 3.50                    | 1556                        |            | 6509 <sup>B</sup>             |
|                     | PZQ (ODT) <sup>[1, 2]</sup>       |                  |    |                         |                         |                             |            |                               |
|                     | HNV                               | (R)-PZQ          | 15 | 4.20                    | 3.00                    | 1548                        |            | 4871 <sup>B</sup> ,4770       |
|                     | HNV                               | (S)-PZQ          | 15 | 4.35                    | 4.00                    | 3234                        |            | 14686 <sup>B</sup>            |

|      |            | PZQ <sup>[3,4]</sup> |   |      |      |      |                    |  |
|------|------------|----------------------|---|------|------|------|--------------------|--|
| 1500 | <i>HNV</i> | <i>(R)-PZQ</i>       | 1 | 1.68 | 2.73 | 51   | 338 <sup>B</sup>   |  |
|      | <i>HNV</i> |                      | 9 | 1.55 | 2.67 | 160  | 870 <sup>B</sup>   |  |
|      | <i>HNV</i> | <i>(S)-PZQ</i>       | 1 | 1.33 | 2.33 | 165  | 857 <sup>B</sup>   |  |
|      | <i>HNV</i> |                      | 9 | 1.46 | 2.55 | 520  | 2990 <sup>B</sup>  |  |
|      | <i>HNV</i> | <i>(R)-4-OH-</i>     | 1 | 1.51 | 2.56 | 2176 | 12865 <sup>B</sup> |  |
|      | <i>HNV</i> | <i>PZQ</i>           | 9 | 1.7  | 2.72 | 1310 | 8800 <sup>B</sup>  |  |
|      | <i>HNV</i> |                      | 1 | 1.68 | 3.32 | 1169 | 7717 <sup>B</sup>  |  |
|      | <i>HNV</i> | <i>(S)-4-OH-</i>     | 9 | 1.91 | 3.05 | 780  | 5600 <sup>B</sup>  |  |
|      |            | <i>PZQ</i>           |   |      |      |      |                    |  |

## References

1. Bonate PL, Wang TL, Passier P, Bagchus W, Burt H, Lupfert C, et al. Extrapolation of praziquantel pharmacokinetics to a pediatric population: a cautionary tale. *Journal of Pharmacokinetics and Pharmacodynamics*. 2018;45(5):747-62. doi: 10.1007/s10928-018-9601-1. PubMed PMID: WOS:000445761600008.
2. Bagchus WM, Bezuidenhout D, Harrison-Moench E, Kourany-Lefoll E, Wolna P, Yalkinoglu O. Relative Bioavailability of Orally Dispersible Tablet Formulations of Levo- and Racemic Praziquantel: Two Phase I Studies. *Clinical and translational science*. 2019;12(1):66-76. Epub 2018/12/12. doi: 10.1111/cts.12601. PubMed PMID: 30536632; PubMed Central PMCID: PMC6342245.
3. Lima RM, Ferreira MAD, Carvalho T, Fernandes BJD, Takayanagui OM, Garcia HH, et al. Albendazole-praziquantel interaction in healthy volunteers: kinetic disposition, metabolism and enantioselectivity. *British journal of clinical pharmacology*. 2011;71(4):528-35. doi: 10.1111/j.1365-2125.2010.03874.x. PubMed PMID: WOS:000288249500008.
4. Lima RM, Ferreira MAD, Ponte TMD, Marques MP, Takayanagui OM, Garcia HH, et al. Enantioselective analysis of praziquantel and trans-4-hydroxypraziquantel in human plasma by chiral LC-MS/MS: Application to pharmacokinetics. *Journal of Chromatography B-Analytical Technologies in the Biomedical and Life Sciences*. 2009;877(27):3083-8. doi: 10.1016/j.jchromb.2009.07.036. PubMed PMID: WOS:000270246400021.
