# Supplementary material for: Drug metabolism and pharmacokinetics of praziquantel: A review of variable drug exposure during schistosomiasis treatment in human hosts and experimental models
Source: PubMed Central journal article supplement (PMC7518612; doi:10.1371/journal.pntd.0008649), 2020-09-25
Supplement: pntd.0008649.s007.pdf [file pntd.0008649.s007.pdf]

**S6 Table. Pharmacokinetic parameters in human models after administration of racemic praziquantel (PZQ); includes Infected Patients (P) and Healthy Normal Volunteers (HNV).** The brands, when named, were listed in subscript: (ODT): represents new racemic 150mg oral dispersion formulation (dispersed in water), BILT: Biltricide, DIS: Distocide, CYS: Cysticide formulation given with water. The superscript descriptions show the additional information of the study (a): Class A liver cirrhosis, (b): Class B liver cirrhosis, (c): Class C liver cirrhosis, (d): Fasting, (e): African population, (f): High oil content, (g): Low oil content, (h): Uraemic Patient. Unless otherwise stated the following acronyms represent; AUC: Area under the plasma concentration-time curve, A ( $AUC_{0-t}$ ): Area under the plasma concentration-time curve from time zero to time t, B ( $AUC_{0-inf}$ ): Area under the plasma concentration-time curve extrapolated from time zero to infinity,  $t_{1/2}$ : Elimination half-life,  $C_{max}$ : Peak plasma concentration,  $T_{max}$ : Time to reach peak plasma concentration following drug administration.

| Drug Administered                                                | PZQ Dose (mg/kg) | N  | t <sub>1/2</sub> (h) | T <sub>max</sub> (h) | C <sub>max</sub> (ng/ml) | AUC                |                        |
|------------------------------------------------------------------|------------------|----|----------------------|----------------------|--------------------------|--------------------|------------------------|
|                                                                  |                  |    |                      |                      |                          | (ng/ml/h)          | (ng <sup>*</sup> h/ml) |
| PZQ <sup>[1]</sup>                                               | 5                |    |                      |                      |                          |                    |                        |
| <i>HNV</i>                                                       |                  | 6  | 1.70                 | 2.75                 | 48                       |                    | 167 <sup>A</sup>       |
| PZQ <sup>[1]</sup>                                               | 10               |    |                      |                      |                          |                    |                        |
| <i>HNV</i>                                                       |                  | 6  | 1.30                 | 2.58                 | 66                       |                    | 209 <sup>A</sup>       |
| PZQ <sup>[1-4]</sup>                                             | 20               |    |                      |                      |                          |                    |                        |
| <i>HNV</i>                                                       |                  | 6  | 1.18                 | 2.08                 | 250                      |                    | 645 <sup>A</sup>       |
| <i>HNV</i> <sub>(BILT)</sub> <sup>(e)</sup>                      |                  | 10 | 0.97                 | 1.65                 | 846                      | 1303, 3550         |                        |
| <i>HNV</i> <sub>(DIS)</sub> <sup>(e)</sup>                       |                  | 10 | 1.24                 | 2.60                 | 558                      | 2133, 1563         |                        |
| <i>HNV</i> <sub>(ODT)</sub>                                      |                  | 15 | 3.78                 | 3.50                 | 950                      |                    | 2569 <sup>B</sup>      |
| PZQ <sup>[2, 4-7]</sup>                                          | 40               |    |                      |                      |                          |                    |                        |
| <i>HNV</i> <sub>(BILT)</sub>                                     |                  | 1  | 1.28                 | 2.75                 | 1200                     | 10890              |                        |
| <i>HNV</i> <sub>(BILT)</sub>                                     |                  | 1  | 1.98                 | 2.00                 | 5000                     | 25040              |                        |
| <i>HNV</i> <sub>(BILT)</sub>                                     |                  | 1  | 1.44                 | 2.00                 | 2100                     | 9840               |                        |
| <i>HNV</i> <sub>(BILT)</sub>                                     |                  | 1  | 2.57                 | 1.50                 | 500                      | 2760               |                        |
| <i>HNV</i> <sub>(BILT)</sub>                                     |                  | 1  | 2.67                 | 2.00                 | 2400                     | 13290              |                        |
| <i>HNV</i> <sub>(BILT)</sub>                                     |                  | 1  | 1.98                 | 1.25                 | 100                      | 2300               |                        |
| <i>HNV</i> <sub>(BILT)</sub>                                     |                  | 1  | 4.30                 | 1.75                 | 4400                     | 27600              |                        |
| <i>HNV</i> <sub>(BILT)</sub>                                     |                  | 1  | 1.60                 | 2.25                 | 3600                     | 18100              |                        |
| <i>HNV</i> <sub>(BILT)</sub>                                     |                  | 8  | 1.93                 | 1.89                 | 2130                     | 11750              |                        |
| <i>HNV</i> <sub>(BILT)</sub>                                     |                  | 10 | 2.18                 | 2.00                 | 1281                     | 1303               |                        |
| <i>HNV</i> <sub>(BILT)</sub> <sup>(d)</sup>                      |                  | 6  | 6.30                 | 1.60                 | 823                      | 2110 <sup>B</sup>  |                        |
| <i>HNV</i> <sub>(BILT)</sub> <sup>(d)</sup>                      |                  | 6  | 2.30                 | 2.60                 | 978                      | 3823 <sup>B</sup>  |                        |
| <i>P</i> <sub>(BILT)</sub> <sup>(h)</sup> ( <i>haematobium</i> ) |                  | 1  |                      | 1.00                 | 1040                     |                    |                        |
| <i>HNV</i> <sub>(CYS)</sub>                                      |                  | 30 | 4.41                 | 1.75                 | 2974                     |                    | 10447                  |
| <i>HNV</i> <sub>(CYS)</sub>                                      |                  | 15 | 4.20                 | 2.50                 | 2040                     |                    | 8092                   |
| <i>HNV</i> <sub>(CYS)</sub>                                      |                  | 36 | 3.79                 | 2.50                 | 727                      |                    | 2066                   |
| <i>HNV</i> <sub>(DIS)</sub>                                      |                  | 10 | 2.78                 | 1.72                 | 685                      | 1562               |                        |
| <i>HNV</i> <sub>(DIS)</sub> <sup>(d)</sup>                       |                  | 6  | 8.90                 | 2.10                 | 249                      | 15928 <sup>B</sup> |                        |
| <i>HNV</i> <sub>(DIS)</sub> <sup>(d)</sup>                       |                  | 8  | 3.30                 | 2.60                 | 978                      | 4089 <sup>B</sup>  |                        |
| <i>HNV</i> <sub>(DIS)</sub> <sup>(f)</sup>                       |                  | 8  | 2.50                 | 2.70                 | 1570                     | 5699 <sup>B</sup>  |                        |
| <i>HNV</i> <sub>(DIS)</sub> <sup>(g)</sup>                       |                  | 8  | 2.30                 | 2.00                 | 2093                     | 7126 <sup>B</sup>  |                        |
| <i>P</i> <sub>(DIS)</sub> <sup>(a)</sup> ( <i>mansoni</i> )      |                  | 10 |                      | 1.37                 | 931                      | 3870               |                        |
| <i>P</i> <sub>(DIS)</sub> <sup>(b)</sup> ( <i>mansoni</i> )      |                  | 10 |                      | 2.21                 | 1469                     | 10720              |                        |
| <i>P</i> <sub>(DIS)</sub> <sup>(c)</sup> ( <i>mansoni</i> )      |                  | 10 |                      | 3.20                 | 3573                     | 45350              |                        |
| <i>P</i> <sub>(DIS)</sub> <sup>(d, e)</sup> ( <i>mansoni</i> )   |                  | 9  | 11.90                | 1.60                 | 1618                     | 5409 <sup>B</sup>  |                        |
| <i>P</i> <sub>(DIS)</sub> ( <i>mansoni</i> )                     |                  | 10 |                      | 1.48                 | 833                      | 3023               |                        |
| <i>HNV</i> <sub>(ODT)</sub>                                      |                  | 30 | 4.46                 | 3.00                 | 3250                     |                    | 9627 <sup>B</sup>      |
| <i>HNV</i> <sub>(ODT)</sub> <sup>(d)</sup>                       |                  | 14 | 4.89                 | 4.50                 | 1042                     |                    | 5956 <sup>B</sup>      |
| PZQ <sup>[1]</sup>                                               | 50               |    |                      |                      |                          |                    |                        |
| <i>HNV</i>                                                       |                  | 8  | 1.19                 | 1.88                 | 1319                     |                    | 3931 <sup>A</sup>      |
| PZQ <sup>[4]</sup>                                               | 60               |    |                      |                      |                          |                    |                        |
| <i>HNV</i> <sub>(ODT)</sub>                                      |                  | 15 | 4.32                 | 3.5                  | 4780                     |                    | 19679.5 <sup>B</sup>   |
| PZQ <sup>[1, 8]</sup>                                            |                  |    |                      |                      |                          |                    |                        |
| <i>HNV</i>                                                       | (3 x 10)         | 6  | 0.84                 | 2.25                 | 65                       |                    |                        |
| <i>HNV</i>                                                       | (3 x 20)         | 6  | 1.22                 | 1.08                 | 479                      |                    |                        |
| <i>HNV</i>                                                       | (3 x 25)         | 6  | 1.30                 | 2.25                 | 344                      |                    |                        |
| <i>HNV</i>                                                       | (3 x 25)         | 1  | 1.70                 |                      |                          | 5870               |                        |
| <i>HNV</i>                                                       | (3 x 25)         | 1  | 2.70                 |                      |                          | 11930              |                        |
| <i>HNV</i>                                                       | (3 x 25)         | 1  | 1.70                 |                      |                          | 7850               |                        |
| <i>HNV</i>                                                       | (3 x 25)         | 1  | 1.70                 |                      |                          | 2720               |                        |
| <i>HNV</i>                                                       | (3 x 25)         | 1  | 2.10                 |                      |                          | 8620               |                        |
| <i>HNV</i>                                                       | (3 x 25)         | 1  | 1.80                 |                      |                          | 7490               |                        |
| <i>HNV</i>                                                       | (3 x 25)         | 1  | 1.20                 |                      |                          | 7410               |                        |
| <i>HNV</i>                                                       | (3 x 25)         | 1  | 1.80                 |                      |                          | 12340              |                        |

## References

1. Leopold G, Ungethum W, Groll E, Diekmann HW, Nowak H, Wegner DH. Clinical pharmacology in normal volunteers of praziquantel, a new drug against schistosomes and cestodes. An example of a complex study covering both tolerance and pharmacokinetics. *European journal of clinical pharmacology*. 1978;14(4):281-91. Epub 1978/12/01. PubMed PMID: 729622.
2. Metwally A, Bennett J, Botros S, Ebeid F, el attar Gel D. Impact of drug dosage and brand on bioavailability and efficacy of praziquantel. *Pharmacological research*. 1995;31(1):53-9. Epub 1995/01/01. PubMed PMID: 7784306.
3. Metwally A, Bennett JL, Botros S, Ebeid F. Effect of cimetidine, bicarbonate and glucose on the bioavailability of different formulations of praziquantel. *Arzneimittel-Forschung/Drug Research*. 1995;45-1(4):516-8. PubMed PMID: WOS:A1995QU77700014.
4. Bonate PL, Wang TL, Passier P, Bagehus W, Burt H, Lupfert C, et al. Extrapolation of praziquantel pharmacokinetics to a pediatric population: a cautionary tale. *Journal of Pharmacokinetics and Pharmacodynamics*. 2018;45(5):747-62. doi: 10.1007/s10928-018-9601-1. PubMed PMID: WOS:000445761600008.
5. Masimirembwa CM, Naik YS, Hasler JA. The effect of chloroquine on the pharmacokinetics and metabolism of praziquantel in rats and in humans. *Biopharmaceutics & Drug Disposition*. 1994;15(1):33-43. doi: 10.1002/bdd.2510150103. PubMed PMID: WOS:A1994MT35100002.
6. Mandour ME, el Turabi H, Homeida MM, el Sadig T, Ali HM, Bennett JL, et al. Pharmacokinetics of praziquantel in healthy volunteers and patients with schistosomiasis. *Transactions of the Royal Society of Tropical Medicine and Hygiene*. 1990;84(3):389-93. Epub 1990/05/01. PubMed PMID: 2124391.
7. Elguiniady MA, Eltouny MA, Abdelbary MA, Abdelfatah SA, Metwally A. Clinical and pharmacokinetic study of praziquantel in Egyptian schistosomiasis patients with and without liver cell failure. *American Journal of Tropical Medicine and Hygiene*. 1994;51(6):809-18. doi: 10.4269/ajtmh.1994.51.809. PubMed PMID: WOS:A1994QB81300014.
8. Jung H, Medina R, Castro N, Corona T, Sotelo J. Pharmacokinetic study of praziquantel administered alone and in combination with cimetidine in a single-day therapeutic regimen. *Antimicrobial agents and chemotherapy*. 1997;41(6):1256-9. doi: 10.1128/aac.41.6.1256. PubMed PMID: WOS:A1997XB71200009.
