# Supplementary material for: Drug metabolism and pharmacokinetics of praziquantel: A review of variable drug exposure during schistosomiasis treatment in human hosts and experimental models
Source: PubMed Central journal article supplement (PMC7518612; doi:10.1371/journal.pntd.0008649), 2020-09-25
Supplement: pntd.0008649.s008.pdf [file pntd.0008649.s008.pdf]

**S7 Table. Pharmacokinetic parameters of praziquantel (PZQ), PZQ enantiomers, and the major metabolite in Healthy School Age Children (HSAC), infected school-aged children (SAC), and infected preschool-aged children (PSAC) after the administration of racemic PZQ.** The PZQ brands, when named, were listed in subscript: BILT: Biltricide. Unless otherwise stated the following acronyms represent; AUC: Area under the plasma concentration-time curve, A (AUC<sub>0-8</sub>): Area under the plasma concentration-time curve from time zero to time t, B (AUC<sub>0-inf</sub>): Area under the plasma concentration-time curve extrapolated from time zero to infinity, C (AUC<sub>last</sub>): Area under the plasma concentration-time curve from time zero to time of last measurable concentration, t<sub>1/2</sub>: Elimination half-life, C<sub>max</sub>: Peak plasma concentration, T<sub>max</sub>: Time to reach peak plasma concentration following drug administration.

| Drug Administered                    | Drug Measured             | PZQ Dose (mg/kg)    | N  | t <sub>1/2</sub> (h) | T <sub>max</sub> (h) | C <sub>max</sub> (ng/ml) | AUC                |                    |
|--------------------------------------|---------------------------|---------------------|----|----------------------|----------------------|--------------------------|--------------------|--------------------|
|                                      |                           |                     |    |                      |                      |                          | (ng/h/ml)          | (ng*h/ml)          |
| PZQ <sup>[1]</sup>                   |                           | 20                  |    |                      |                      |                          |                    |                    |
|                                      | <i>PSAC (haematobium)</i> | <i>(R)-PZQ</i>      | 39 | 7.39                 | 1.00                 | 320                      |                    | 1160 <sup>C</sup>  |
|                                      | <i>PSAC (mansoni)</i>     |                     | 32 | 5.02                 | 1.50                 | 330                      |                    | 1350 <sup>C</sup>  |
|                                      | <i>SAC (haematobium)</i>  |                     | 45 | 4.41                 | 2.50                 | 180                      |                    | 1010 <sup>C</sup>  |
|                                      | <i>SAC (mansoni)</i>      |                     | 47 | 3.12                 | 1.00                 | 70                       |                    | 270 <sup>C</sup>   |
|                                      | <i>PSAC (haematobium)</i> | <i>(S)-PZQ</i>      | 39 | 5.58                 | 1.00                 | 600                      |                    | 1800 <sup>C</sup>  |
|                                      | <i>PSAC (mansoni)</i>     |                     | 32 | 4.32                 | 1.50                 | 500                      |                    | 1820 <sup>C</sup>  |
|                                      | <i>SAC (haematobium)</i>  |                     | 45 | 4.92                 | 1.50                 | 340                      |                    | 1670 <sup>C</sup>  |
|                                      | <i>SAC (mansoni)</i>      |                     | 47 | 3.59                 | 1.00                 | 190                      |                    | 600 <sup>C</sup>   |
|                                      | <i>PSAC (haematobium)</i> | <i>(R)-4-OH-PZQ</i> | 39 | 3.49                 | 2.00                 | 4920                     |                    | 23080 <sup>C</sup> |
|                                      | <i>PSAC (mansoni)</i>     |                     | 32 | 2.88                 | 2.50                 | 3240                     |                    | 16840 <sup>C</sup> |
|                                      | <i>SAC (haematobium)</i>  |                     | 45 | 3.28                 | 2.50                 | 4640                     |                    | 22200 <sup>C</sup> |
|                                      | <i>SAC (mansoni)</i>      |                     | 47 | 2.73                 | 2.00                 | 6430                     |                    | 29870 <sup>C</sup> |
| PZQ <sub>(BILT)</sub> <sup>[2]</sup> |                           | 30                  |    |                      |                      |                          |                    |                    |
|                                      | <i>HSAC</i>               | <i>PZQ</i>          | 1  | x                    | 1.50                 | 160                      | 761 <sup>A</sup>   |                    |
|                                      | <i>HSAC</i>               |                     | 1  | 4.2                  | 1.50                 | 817                      | 2870 <sup>A</sup>  |                    |
|                                      | <i>HSAC</i>               |                     | 1  | 4.2                  | 1.50                 | 820                      | 2867 <sup>A</sup>  |                    |
|                                      | <i>HSAC</i>               |                     | 1  | 1.1                  | 2.00                 | 2096                     | 4437 <sup>A</sup>  |                    |
|                                      | <i>HSAC</i>               |                     | 1  | 1.1                  | 2.00                 | 2365                     | 4753 <sup>A</sup>  |                    |
|                                      | <i>HSAC</i>               |                     | 1  | 2.8                  | 2.00                 | 1022                     | 2508 <sup>A</sup>  |                    |
|                                      | <i>HSAC</i>               |                     | 6  | 2.7                  | 1.75                 | 1213                     | 30327 <sup>A</sup> |                    |
|                                      | <i>SAC (haematobium)</i>  |                     | 1  | 2.7                  | 1.50                 | 4822                     | 1419 <sup>A</sup>  |                    |
|                                      | <i>SAC (haematobium)</i>  |                     | 1  | 1.3                  | 1.00                 | 2346                     | 3742 <sup>A</sup>  |                    |
|                                      | <i>SAC (haematobium)</i>  |                     | 1  | 1.4                  | 1.50                 | 4088                     | 6126 <sup>A</sup>  |                    |
|                                      | <i>SAC (haematobium)</i>  |                     | 1  | 2                    | 1.50                 | 500                      | 1061 <sup>A</sup>  |                    |
|                                      | <i>SAC (haematobium)</i>  |                     | 1  | 0.8                  | 4.00                 | 3868                     | 8081 <sup>A</sup>  |                    |
|                                      | <i>SAC (haematobium)</i>  |                     | 5  | 1.7                  | 1.90                 | 3125                     | 40858 <sup>A</sup> |                    |
| PZQ <sup>[1,3]</sup>                 |                           | 40                  |    |                      |                      |                          |                    |                    |
|                                      | <i>PSAC (haematobium)</i> | <i>(R)-PZQ</i>      | 43 | 5.57                 | 1.50                 | 410                      |                    | 1170 <sup>C</sup>  |
|                                      | <i>PSAC (mansoni)</i>     |                     | 29 | 5.65                 | 1.00                 | 490                      |                    | 1710 <sup>C</sup>  |

|                           |                     |    |      |      |        |                   |                     |
|---------------------------|---------------------|----|------|------|--------|-------------------|---------------------|
| <i>SAC (haematobium)</i>  |                     | 46 | 4.33 | 2.00 | 320    |                   | 1150 <sup>C</sup>   |
| <i>SAC (mansoni)</i>      |                     | 30 | 3.48 | 3.28 | 131100 | 500 <sup>B</sup>  |                     |
| <i>SAC (mansoni)</i>      |                     | 46 | 3.91 | 1.50 | 250    |                   | 780 <sup>C</sup>    |
| <i>PSAC (haematobium)</i> | <i>(S)-PZQ</i>      | 43 | 4.94 | 1.50 | 910    |                   | 2240 <sup>C</sup>   |
| <i>PSAC (mansoni)</i>     |                     | 29 | 4.64 | 1.00 | 900    |                   | 2200 <sup>C</sup>   |
| <i>SAC (haematobium)</i>  |                     | 46 | 4.61 | 2.00 | 740    |                   | 2730 <sup>C</sup>   |
| <i>SAC (mansoni)</i>      |                     | 30 | 2.96 | 3.30 | 581300 | 2620 <sup>B</sup> |                     |
| <i>SAC (mansoni)</i>      |                     | 46 | 2.25 | 1.50 | 770    |                   | 2190 <sup>C</sup>   |
| <i>PSAC (haematobium)</i> | <i>(R)-4-OH-PZQ</i> | 43 | 3.71 | 3.00 | 8140   |                   | 42590 <sup>C</sup>  |
| <i>PSAC (mansoni)</i>     |                     | 29 | 3.42 | 2.00 | 6920   |                   | 32740 <sup>C</sup>  |
| <i>SAC (haematobium)</i>  |                     | 46 | 3.7  | 3.00 | 8160   |                   | 47790 <sup>C</sup>  |
| <i>SAC (mansoni)</i>      |                     | 46 | 3.09 | 2.50 | 10320  |                   | 56590 <sup>C</sup>  |
| PZQ <sup>[1,3]</sup>      |                     | 60 |      |      |        |                   |                     |
| <i>PSAC (haematobium)</i> | <i>(R)-PZQ</i>      | 41 | 5.09 | 1.5  | 620    |                   | 2250 <sup>C</sup>   |
| <i>PSAC (mansoni)</i>     |                     | 33 | 5.95 | 1    | 690    |                   | 2740 <sup>C</sup>   |
| <i>SAC (haematobium)</i>  |                     | 44 | 5.34 | 2.5  | 440    |                   | 1840 <sup>C</sup>   |
| <i>SAC (mansoni)</i>      |                     | 28 | 4.36 | 3.13 | 144950 | 430 <sup>B</sup>  |                     |
| <i>SAC (mansoni)</i>      |                     | 42 | 4.49 | 1.5  | 290    |                   | 1000 <sup>C</sup>   |
| <i>PSAC (haematobium)</i> | <i>(S)-PZQ</i>      | 41 | 4.8  | 2    | 1220   |                   | 4870 <sup>C</sup>   |
| <i>PSAC (mansoni)</i>     |                     | 33 | 4.58 | 1    | 1330   |                   | 4990 <sup>C</sup>   |
| <i>SAC (haematobium)</i>  |                     | 44 | 5.58 | 2.5  | 1250   | 2580 <sup>B</sup> | 5090 <sup>C</sup>   |
| <i>SAC (mansoni)</i>      |                     | 28 | 3.02 | 3.23 | 695560 |                   |                     |
| <i>SAC (mansoni)</i>      |                     | 42 | 4.05 | 2    | 1000   |                   | 3500 <sup>C</sup>   |
| <i>PSAC (haematobium)</i> | <i>(R)-4-OH-PZQ</i> | 41 | 3.64 | 3    | 13490  |                   | 107440 <sup>C</sup> |
| <i>PSAC (mansoni)</i>     |                     | 33 | 3.54 | 2.5  | 8290   |                   | 49940 <sup>C</sup>  |
| <i>SAC (haematobium)</i>  |                     | 44 | 3.86 | 4.5  | 11490  |                   | 88320 <sup>C</sup>  |
| <i>SAC (mansoni)</i>      |                     | 42 | 3.19 | 3    | 13570  |                   | 89220 <sup>C</sup>  |

## References

1. Kovac J, Meister I, Neodo A, Panic G, Coulibaly JT, Falcoz C, et al. Pharmacokinetics of Praziquantel in *Schistosoma mansoni*- and *Schistosoma haematobium*-Infected School- and Preschool-Aged Children. *Antimicrobial agents and chemotherapy*. 2018;62(8). doi: 10.1128/AAC.02253-17;e02253-17. PubMed PMID: WOS:000440008400078.
2. Ofori-Adjei D, Adjepon-Yamoah KK, Lindstrom B. Oral praziquantel kinetics in normal and *Schistosoma haematobium*-infected subjects. *Therapeutic drug monitoring*. 1988;10(1):45-9. Epub 1988/01/01. PubMed PMID: 3131934.
3. Bustinduy AL, Waterhouse D, de Sousa-Figueiredo JC, Roberts SA, Atuhaire A, Van Dam GJ, et al. Population Pharmacokinetics and Pharmacodynamics of Praziquantel in Ugandan Children with Intestinal Schistosomiasis: Higher Dosages Are Required for Maximal Efficacy. *mBio*. 2016;7(4). Epub 2016/08/11. doi: 10.1128/mBio.00227-16. PubMed PMID: 27507822; PubMed Central PMCID: PMC4992966.
