# Supplementary material for: Drug metabolism and pharmacokinetics of praziquantel: A review of variable drug exposure during schistosomiasis treatment in human hosts and experimental models
Source: PubMed Central journal article supplement (PMC7518612; doi:10.1371/journal.pntd.0008649), 2020-09-25
Supplement: pntd.0008649.s009.pdf [file pntd.0008649.s009.pdf]

**S8 Table. Efficacy parameters of racemic praziquantel (PZQ) treatment on infected preschool-aged children (PSAC) and school-aged children (SAC), and the effect of the different brands of PZQ available.** The brands, when named, are listed in subscript; BILT: Biltricide, DIS: Distocide. The superscript descriptions show the additional information of the study; (a): Heavy egg load, (b): Moderate egg load, (c): Light egg load.

| Drug Administered                                    | PZQ Dose (mg/kg) | N  | Egg Reduction Rate (%) | Cure Rate (%) |
|------------------------------------------------------|------------------|----|------------------------|---------------|
| PZQ <sup>[1-3]</sup>                                 | 20               |    |                        |               |
| <i>PSAC (haematobium)</i>                            |                  | 39 | 98.6                   | 88.2          |
| <i>PSAC (mansoni)</i>                                |                  | 32 | 90.8                   | 65.5          |
| <i>SAC (haematobium)</i>                             |                  | 45 | 97.5                   | 54.6          |
| <i>SAC (mansoni)</i>                                 |                  | 47 | 84.2                   | 30.4          |
| <i>SAC (haematobium)</i>                             |                  | 11 | 100                    | 100           |
| <i>SAC<sub>(BILT)</sub> <sup>(a)</sup> (mansoni)</i> |                  | 20 | 96.4                   | 30.0          |
| <i>SAC<sub>(BILT)</sub> <sup>(b)</sup> (mansoni)</i> |                  | 39 | 86.2                   | 42.4          |
| <i>SAC<sub>(BILT)</sub> <sup>(c)</sup> (mansoni)</i> |                  | 33 | 72.7                   | 66.7          |
| <i>SAC<sub>(DIS)</sub> <sup>(a)</sup> (mansoni)</i>  |                  | 25 | 98.0                   | 47.1          |
| <i>SAC<sub>(DIS)</sub> <sup>(b)</sup> (mansoni)</i>  |                  | 65 | 94.0                   | 38.7          |
| <i>SAC<sub>(DIS)</sub> <sup>(c)</sup> (mansoni)</i>  |                  | 35 | 86.1                   | 57.1          |
| PZQ <sup>[1-4]</sup>                                 | 40               |    |                        |               |
| <i>PSAC (haematobium)</i>                            |                  | 43 | 97.1                   | 77.5          |
| <i>PSAC (mansoni)</i>                                |                  | 29 | 95.3                   | 74.1          |
| <i>SAC (haematobium)</i>                             |                  | 46 | 98.8                   | 72.5          |
| <i>SAC (mansoni)</i>                                 |                  | 46 | 98.3                   | 68.9          |
| <i>SAC (haematobium)</i>                             |                  | 13 | 100                    | 100           |
| <i>SAC (mansoni)</i>                                 |                  | 30 | 82.0                   | 70.0          |
| <i>SAC<sub>(BILT)</sub> <sup>(a)</sup> (mansoni)</i> |                  | 30 | 96.5                   | 73.3          |
| <i>SAC<sub>(BILT)</sub> <sup>(b)</sup> (mansoni)</i> |                  | 26 | 85.4                   | 52.0          |
| <i>SAC<sub>(BILT)</sub> <sup>(c)</sup> (mansoni)</i> |                  | 24 | 79.5                   | 66.7          |
| <i>SAC<sub>(DIS)</sub> <sup>(a)</sup> (mansoni)</i>  |                  | 30 | 99.9                   | 90            |
| <i>SAC<sub>(DIS)</sub> <sup>(b)</sup> (mansoni)</i>  |                  | 15 | 93.4                   | 46.7          |
| <i>SAC<sub>(DIS)</sub> <sup>(c)</sup> (mansoni)</i>  |                  | 24 | 90.3                   | 70.9          |
| PZQ <sup>[1, 2, 4]</sup>                             | 60               |    |                        |               |
| <i>PSAC (haematobium)</i>                            |                  | 41 | 96.3                   | 67.6          |
| <i>PSAC (mansoni)</i>                                |                  | 33 | 97.6                   | 78.1          |
| <i>SAC (haematobium)</i>                             |                  | 44 | 97.5                   | 63.4          |
| <i>SAC (mansoni)</i>                                 |                  | 42 | 99.1                   | 82.9          |
| <i>SAC (haematobium)</i>                             |                  | 11 | 99.4                   | 90.9          |
| <i>SAC (mansoni)</i>                                 |                  | 28 | 91                     | 82            |

## **References**

1. Kovac J, Meister I, Neodo A, Panic G, Coulibaly JT, Falcoz C, et al. Pharmacokinetics of Praziquantel in Schistosoma mansoni- and Schistosoma haematobium-Infected School- and Preschool-Aged Children. *Antimicrobial agents and chemotherapy*. 2018;62(8). doi: 10.1128/AAC.02253-17;e02253-17. PubMed PMID: WOS:000440008400078.
2. Kovac J, Panic G, Neodo A, Meister I, Coulibaly JT, Schulz JD, et al. Evaluation of a novel micro-sampling device, Mitra (TM), in comparison to dried blood spots, for analysis of praziquantel in Schistosoma haematobium-infected children in rural Cote d'Ivoire. *Journal of Pharmaceutical and Biomedical Analysis*. 2018;151:339-46. doi: 10.1016/j.jpba.2018.01.030. PubMed PMID: WOS:000426025700041.
3. Metwally A, Bennett J, Botros S, Ebeid F, el attar Gel D. Impact of drug dosage and brand on bioavailability and efficacy of praziquantel. *Pharmacological research*. 1995;31(1):53-9. Epub 1995/01/01. PubMed PMID: 7784306.
4. Bustinduy AL, Waterhouse D, de Sousa-Figueiredo JC, Roberts SA, Atuhaire A, Van Dam GJ, et al. Population Pharmacokinetics and Pharmacodynamics of Praziquantel in Ugandan Children with Intestinal Schistosomiasis: Higher Dosages Are Required for Maximal Efficacy. *mBio*. 2016;7(4). Epub 2016/08/11. doi: 10.1128/mBio.00227-16. PubMed PMID: 27507822; PubMed Central PMCID: PMC4992966.
