# Supplementary material for: Drug metabolism and pharmacokinetics of praziquantel: A review of variable drug exposure during schistosomiasis treatment in human hosts and experimental models
Source: PubMed Central journal article supplement (PMC7518612; doi:10.1371/journal.pntd.0008649), 2020-09-25
Supplement: pntd.0008649.s010.pdf [file pntd.0008649.s010.pdf]

**S9 Table. The comparison of dosing racemic praziquantel (PZQ) alone, or with drug ‘B’ on PZQ’s antischistosomal efficacy in rodent models.** The superscript descriptions show the additional information of the study; (e): Without H<sub>2</sub>O, (f):Sudanese population, (g): High oil diet, (h): Low oil diet, (n): Egyptian population not cured after 2<sup>nd</sup> dose PZQ, (k): Egyptian population, (l): Ureamic patient, (m): Egyptian population not cured after dose PZQ, (i): CIM dosed 1h prior to PZQ, (j): CHQ dosed 2h before PZQ. Unless otherwise stated the following acronyms represent; M: Mouse, H: Hamster, WBR: Worm burden reduction, MEF: Mefloquine, ABT: 1-aminobenzotriazole, ART: Artemether, NIL: Nilutamide, MET: Metrifonate, DEX: Dexamethasone, CLO: Clonazepam, TUM: Turmeric.

| Drug Administered                          | Drug Effect Measured     | PZQ Dose (mg/kg) | B Dose (mg/kg) | N  | WBR (%) |
|--------------------------------------------|--------------------------|------------------|----------------|----|---------|
| PZQ <sup>[1-5]</sup>                       |                          |                  |                |    |         |
| <i>M</i> <sup>(f)</sup> ( <i>mansoni</i> ) | <i>PZQ</i>               | 50               | -              | 4  | 13      |
| <i>M</i> ( <i>mansoni</i> )                |                          |                  |                | 5  | 16      |
| <i>H</i> ( <i>mansoni</i> )                |                          | 75               |                | 5  | 2       |
| <i>M</i> <sup>(f)</sup> ( <i>mansoni</i> ) |                          | 100              |                | 6  | 15      |
| <i>M</i> ( <i>mansoni</i> )                |                          |                  |                | 5  | 17.8    |
| <i>H</i> ( <i>mansoni</i> )                |                          |                  |                | 5  | 36      |
| <i>M</i> ( <i>mansoni</i> )                | <i>PZQ</i>               | 200              |                | 14 | 56.6    |
| <i>M</i> ( <i>mansoni</i> )                | ( <i>R</i> )- <i>PZQ</i> |                  |                | 6  | 68      |
| <i>M</i> ( <i>mansoni</i> )                |                          | 400              |                | 6  | 97      |
| <i>M</i> ( <i>mansoni</i> )                |                          |                  |                | 4  | 84      |
| <i>M</i> ( <i>mansoni</i> )                | <i>PZQ</i>               | 500              |                | 10 | 95      |
| <i>M</i> ( <i>mansoni</i> )                |                          | (5 x 12.5)       |                | 8  | 23.07   |
| <i>M</i> ( <i>mansoni</i> )                |                          | (5 x 25)         |                | 8  | 37.69   |
| <i>M</i> ( <i>mansoni</i> )                |                          | (5 x 50)         |                | 8  | 65.75   |
| <i>M</i> ( <i>mansoni</i> )                |                          | (5 x 100)        |                | 8  | 85.75   |
| <i>M</i> ( <i>mansoni</i> )                |                          | (5 x 200)        |                | 8  | 91.53   |
| PZQ + ABT <sup>[1]</sup>                   |                          |                  |                |    |         |
| <i>M</i> <sup>(g)</sup> ( <i>mansoni</i> ) | ( <i>R</i> )- <i>PZQ</i> | 50               | 50             | 2  | 21      |
| <i>M</i> <sup>(h)</sup> ( <i>mansoni</i> ) |                          |                  |                | 6  | 53      |
| <i>M</i> <sup>(g)</sup> ( <i>mansoni</i> ) |                          | 100              | 20             | 5  | 60      |
| <i>M</i> <sup>(h)</sup> ( <i>mansoni</i> ) |                          |                  | 50             | 5  | 79      |
| <i>M</i> <sup>(g)</sup> ( <i>mansoni</i> ) |                          | 200              | 20             | 5  | 100     |
| <i>M</i> <sup>(h)</sup> ( <i>mansoni</i> ) |                          |                  | 50             | 4  | 88      |
| PZQ + ART <sup>[5, 6]</sup>                |                          |                  |                |    |         |
| <i>H</i> <sup>(i)</sup> ( <i>mansoni</i> ) | <i>PZQ</i>               | 75               | 150            | 5  | 81      |
| <i>H</i> <sup>(j)</sup> ( <i>mansoni</i> ) |                          |                  |                | 5  | 84      |
| <i>H</i> <sup>(k)</sup> ( <i>mansoni</i> ) |                          |                  |                | 5  | 82      |
| <i>H</i> <sup>(l)</sup> ( <i>mansoni</i> ) |                          |                  |                | 5  | 84      |
| <i>H</i> <sup>(m)</sup> ( <i>mansoni</i> ) |                          |                  |                | 5  | 77      |

|                                            |                          |           |          |    |       |
|--------------------------------------------|--------------------------|-----------|----------|----|-------|
| <i>H</i> <sup>(l)</sup> ( <i>mansoni</i> ) |                          |           |          | 5  | 68    |
| <i>H</i> <sup>(j)</sup> ( <i>mansoni</i> ) |                          |           |          | 5  | 76    |
| <i>H</i> <sup>(k)</sup> ( <i>mansoni</i> ) |                          |           |          | 5  | 73    |
| <i>H</i> <sup>(l)</sup> ( <i>mansoni</i> ) |                          |           |          | 5  | 81    |
| <i>H</i> <sup>(k)</sup> ( <i>mansoni</i> ) | 100                      | 300       |          | 5  | 95    |
| <i>H</i> <sup>(l)</sup> ( <i>mansoni</i> ) |                          |           |          | 5  | 99    |
| <i>H</i> <sup>(m)</sup> ( <i>mansoni</i> ) |                          |           |          | 5  | 92    |
| <i>H</i> <sup>(k)</sup> ( <i>mansoni</i> ) |                          |           |          | 5  | 92    |
| <i>H</i> <sup>(l)</sup> ( <i>mansoni</i> ) |                          |           |          | 5  | 96    |
| <i>H</i> <sup>(m)</sup> ( <i>mansoni</i> ) |                          |           |          | 5  | 90    |
| <i>M</i> ( <i>mansoni</i> )                | (5 x 12.5)               | 400       |          | 8  | 56.52 |
| <i>M</i> ( <i>mansoni</i> )                | (5 x 25)                 |           |          | 8  | 73.07 |
| <i>M</i> ( <i>mansoni</i> )                | (5 x 50)                 |           |          | 8  | 80.37 |
| <i>M</i> ( <i>mansoni</i> )                | (5 x 100)                |           |          | 8  | 85.75 |
| <i>M</i> ( <i>mansoni</i> )                | (5 x 200)                |           |          | 8  | 93.44 |
| PZQ + CLO <sup>[2]</sup>                   |                          |           |          |    |       |
| <i>M</i> ( <i>mansoni</i> )                | <i>PZQ</i>               | 200       | 10       | 14 | 61    |
| PZQ + DEX <sup>[1]</sup>                   |                          |           |          |    |       |
| <i>M</i> <sup>(n)</sup> ( <i>mansoni</i> ) | ( <i>R</i> )- <i>PZQ</i> | 400       | 100      | 4  | 73    |
| PZQ + MEF <sup>[3]</sup>                   |                          |           |          |    |       |
| <i>M</i> <sup>(e)</sup> ( <i>mansoni</i> ) | <i>PZQ</i>               | 42.5      | 15       | 4  | 19.2  |
| <i>M</i> <sup>(j)</sup> ( <i>mansoni</i> ) |                          | 50        | 50       | 8  | 25    |
| <i>M</i> <sup>(j)</sup> ( <i>mansoni</i> ) |                          |           |          | 8  | 61.5  |
| <i>M</i> <sup>(j)</sup> ( <i>mansoni</i> ) |                          |           |          | 8  | 47.8  |
| <i>M</i> <sup>(e)</sup> ( <i>mansoni</i> ) |                          | 85        | 30       | 4  | 51.6  |
| <i>M</i> <sup>(j)</sup> ( <i>mansoni</i> ) |                          | 100       | 100      | 8  | 86    |
| <i>M</i> <sup>(j)</sup> ( <i>mansoni</i> ) |                          |           |          | 9  | 93.1  |
| <i>M</i> <sup>(j)</sup> ( <i>mansoni</i> ) |                          |           |          | 9  | 54.7  |
| <i>M</i> <sup>(e)</sup> ( <i>mansoni</i> ) |                          | 170       | 60       | 4  | 91.8  |
| <i>M</i> <sup>(e)</sup> ( <i>mansoni</i> ) |                          | 340       | 120      | 4  | 97.8  |
| PZQ + MET                                  |                          |           |          |    |       |
| <i>M</i> ( <i>mansoni</i> )                |                          | (5 x 100) | (5 x 50) | X  | 95.1  |
| PZQ + NIL <sup>[4]</sup>                   |                          |           |          |    |       |
| <i>M</i> ( <i>mansoni</i> )                | <i>PZQ</i>               | 50        | 100      | 5  | 11.7  |
| <i>M</i> ( <i>mansoni</i> )                |                          | 100       | 100      | 5  | 3.1   |
| <i>M</i> ( <i>mansoni</i> )                |                          | 100       | 200      | 5  | 90.6  |
| PZQ + TUM <sup>[7]</sup>                   |                          |           |          |    |       |
| <i>M</i> ( <i>mansoni</i> )                | <i>PZQ</i>               | 500       | 400      | 10 | 100   |

## References

1. Abila N, Keiser J, Vargas M, Reimers N, Haas H, Spangenberg T. Evaluation of the pharmacokinetic-pharmacodynamic relationship of praziquantel in the schistosoma mansoni mouse model: Possible clinical implications. *Tropical Medicine and International Health*. 2017;22 (Supplement 1):136-7. doi: <http://dx.doi.org/10.1111/%28ISSN%291365-3156>. PubMed PMID: 618977725.
2. Araujo N, De Mattos ACA, Coelho PMZ, Katz N. Association of oxamniquine praziquantel and clonazepam in experimental Schistosomiasis mansoni. *Memorias do Instituto Oswaldo Cruz*. 2008;103(8):781-5. PubMed PMID: 354009130.

3. Keiser J, Manneck T, Vargas M. Interactions of mefloquine with praziquantel in the schistosoma mansoni mouse model and in vitro. *Journal of Antimicrobial Chemotherapy*. 2011;66(8):1791-7. doi: <http://dx.doi.org/10.1093/jac/dkr178>. PubMed PMID: 362161771.
4. Keiser J, Vargas M, Vennerstrom JL. Activity of antiandrogens against juvenile and adult *Schistosoma mansoni* in mice. *Journal of Antimicrobial Chemotherapy*. 2010;65(9):1991-5. doi: <http://dx.doi.org/10.1093/jac/dkq233>. PubMed PMID: 359359597.
5. Utzinger J, Chollet J, You JQ, Mei JY, Tanner M, Xiao SH. Effect of combined treatment with praziquantel and artemether on *Schistosoma japonicum* and *Schistosoma mansoni* in experimentally infected animals. *Acta Tropica*. 2001;80(1):9-18. doi: 10.1016/s0001-706x(01)00138-3. PubMed PMID: WOS:000170709200002.
6. Botros SS, Hammam OA, Mahmoud M, Bergquist R. Praziquantel efficacy in mice infected with PZQ non-susceptible *S. mansoni* isolate treated with artemether: Parasitological, biochemical and immunohistochemical assessment. *Apmis*. 2010;118(9):692-702. doi: <http://dx.doi.org/10.1111/j.1600-0463.2010.02645.x>. PubMed PMID: 359413192.
7. Hussein A, Rashed S, El Hayawan I, El-Sayed R, Ali H. Evaluation of the Anti-schistosomal Effects of Turmeric (*Curcuma longa*) Versus Praziquantel in *Schistosoma mansoni* Infected Mice. *Iranian Journal of Parasitology*. 2017;12(4):587-96. PubMed PMID: WOS:000418756700014
