# Supplementary material for: Drug metabolism and pharmacokinetics of praziquantel: A review of variable drug exposure during schistosomiasis treatment in human hosts and experimental models
Source: PubMed Central journal article supplement (PMC7518612; doi:10.1371/journal.pntd.0008649), 2020-09-25
Supplement: pntd.0008649.s012.pdf [file pntd.0008649.s012.pdf]

**S11 Table. The comparison of racemic praziquantel (PZQ) alone, and with drug ‘B’ in reducing hepatic granuloma diameter in murine models.** The brands, when named, were listed in subscript; DIS: Distocide. The superscript descriptions show the additional information of the study; (a): PZQ-susceptible *S. mansoni* isolate CD, (b): PZQ-non-susceptible *S. mansoni* isolate EE10. Unless otherwise stated the following acronyms represent; M: Mouse, MEF: Mefloquine, PTX: Pentoxifylline, AdDP: Adamantylamide dipeptide, TUM: Turmeric.

| Drug Administered                            | Drug Effect Measured | PZQ Dose (mg/kg) | B Dose (mg/kg) | N  | Reduction in Hepatic Granuloma Diameter (%) |
|----------------------------------------------|----------------------|------------------|----------------|----|---------------------------------------------|
| PZQ <sup>[1-4]</sup>                         |                      |                  |                |    |                                             |
| <i>M</i> <sup>(a)</sup> ( <i>mansoni</i> )   | <i>PZQ</i>           | (3 x 100)        | -              | 9  | 18.86                                       |
| <i>M</i> <sup>(b)</sup> ( <i>mansoni</i> )   |                      |                  |                | 9  | 13.61                                       |
| <i>M</i> <sup>(a)</sup> ( <i>mansoni</i> )   |                      | (2 x 500)        |                | 9  | 20.58                                       |
| <i>M</i> <sup>(b)</sup> ( <i>mansoni</i> )   |                      |                  |                | 9  | 17.32                                       |
| <i>M</i> ( <i>mansoni</i> )                  |                      | 500              |                | 10 | 46.4                                        |
| <i>M</i> <sub>(DIS)</sub> ( <i>mansoni</i> ) |                      | (2 x 100)        |                | 9  | 15.50                                       |
| <i>M</i> <sub>(DIS)</sub> ( <i>mansoni</i> ) |                      | 200              |                | 8  | 28.08                                       |
| <i>M</i> <sub>(DIS)</sub> ( <i>mansoni</i> ) |                      | (2 x 500)        |                | 9  | 49.50                                       |
| <i>M</i> <sub>(DIS)</sub> ( <i>mansoni</i> ) |                      | 1000             |                | 8  | 39.39                                       |
| PZQ + AdDP <sup>[1]</sup>                    |                      |                  |                |    |                                             |
| <i>CDM</i> ( <i>mansoni</i> )                |                      | (3 x 100)        | 5              | 10 | 20.95                                       |
| <i>EE10M</i> ( <i>mansoni</i> )              |                      |                  |                | 10 | 18.47                                       |
| PZQ <sub>(DIS)</sub> + MEF <sup>[3]</sup>    |                      |                  |                |    |                                             |
| <i>M</i> ( <i>mansoni</i> )                  |                      | 200              | 200            | 8  | 43.23                                       |
| <i>M</i> ( <i>mansoni</i> )                  |                      | 1000             | 400            | 8  | 44.97                                       |
| PZQ <sub>(DIS)</sub> + PTX <sup>[2]</sup>    |                      |                  |                |    |                                             |
| <i>M</i> ( <i>mansoni</i> )                  |                      | (2 x 100)        | (5 x 10)       | 9  | 5.40                                        |
| <i>M</i> ( <i>mansoni</i> )                  |                      |                  |                | 9  | 27.00                                       |
| PZQ + TUM <sup>[4]</sup>                     |                      |                  |                |    |                                             |
| <i>M</i> ( <i>mansoni</i> )                  |                      | 500              | 400            | 10 | 28.60                                       |

## References

1. Botros S, Mahmoud M, Hammam O, Salah F, Zidek Z, Masek K. Effect of adamantylamide dipeptide as adjuvant therapy to praziquantel in mice infected with different *S. mansoni* isolates. *Apmis*. 2006;114(7-8):480-91. doi: [http://dx.doi.org/10.1111/j.1600-0463.2006.apm\\_380.x](http://dx.doi.org/10.1111/j.1600-0463.2006.apm_380.x). PubMed PMID: 44252502.

2. El-Lakkany N, Nosseir M. Pharmacodynamics of pentoxifylline and/or praziquantel in murine schistosomiasis mansoni. *Apmis*. 2007;115(3):184-94. doi: 10.1111/j.1600-0463.2007.apm\_501.x. PubMed PMID: WOS:000244881000002.
3. El-Lakkany NM, el-Din SHS, Sabra A, Hammam OA. Pharmacodynamics of mefloquine and praziquantel combination therapy in mice harbouring juvenile and adult *Schistosoma mansoni*. *Memorias Do Instituto Oswaldo Cruz*. 2011;106(7):814-22. doi: 10.1590/s0074-02762011000700006. PubMed PMID: WOS:000297789800006.
4. Hussein A, Rashed S, El Hayawan I, El-Sayed R, Ali H. Evaluation of the Anti-schistosomal Effects of Turmeric (*Curcuma longa*) Versus Praziquantel in *Schistosoma mansoni* Infected Mice. *Iranian Journal of Parasitology*. 2017;12(4):587-96. PubMed PMID: WOS:000418756700014.
