# Supplementary material for: Drug metabolism and pharmacokinetics of praziquantel: A review of variable drug exposure during schistosomiasis treatment in human hosts and experimental models
Source: PubMed Central journal article supplement (PMC7518612; doi:10.1371/journal.pntd.0008649), 2020-09-25
Supplement: pntd.0008649.s013.pdf [file pntd.0008649.s013.pdf]

**S12 Table. Comparison of the results of this systematic review in comparison to tuberculosis.** The same search criteria was applied to the drugs used to treat tuberculosis.

|                        | <b>Schistosomiasis</b>                                                      | <b>Tuberculosis</b>                                                                                                                                 |
|------------------------|-----------------------------------------------------------------------------|-----------------------------------------------------------------------------------------------------------------------------------------------------|
| <i>Search Criteria</i> | <i>(praziquantel OR PZQ) AND (pharmaco*) AND (schistosom* OR bilharzia)</i> | <i>TS=(Isoniazid OR Rifampin OR Rifadin OR Rimactane OR Ethambutol OR Myambutol OR Pyrazinamide) AND TS=(pharmaco*) AND TS=(tuberculosis OR TB)</i> |
| PubMed                 | 87 Results                                                                  | 1210 Results                                                                                                                                        |
| Web of Science         | 152 Results                                                                 | 1181 Results                                                                                                                                        |
| EMBASE                 | 167 Results                                                                 | 1276 Results                                                                                                                                        |
